# Supplementary figures and images for: The inhibitory microcircuit of the substantia nigra provides feedback gain control of the basal ganglia output
Source: eLife journal article supplement (doi:10.7554/elife.02397), 2014-05-21

**Figure 3-figure supplemental 2**

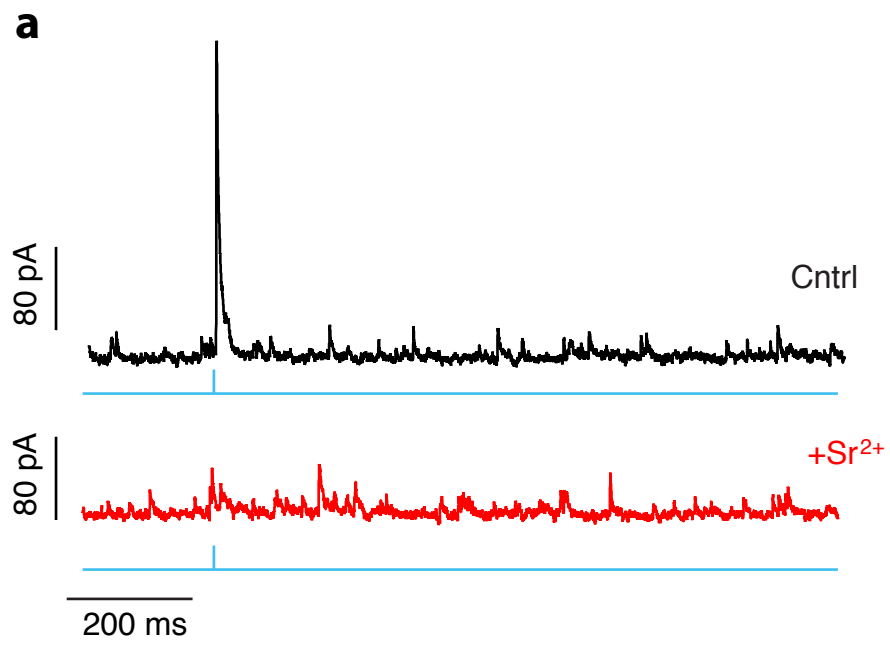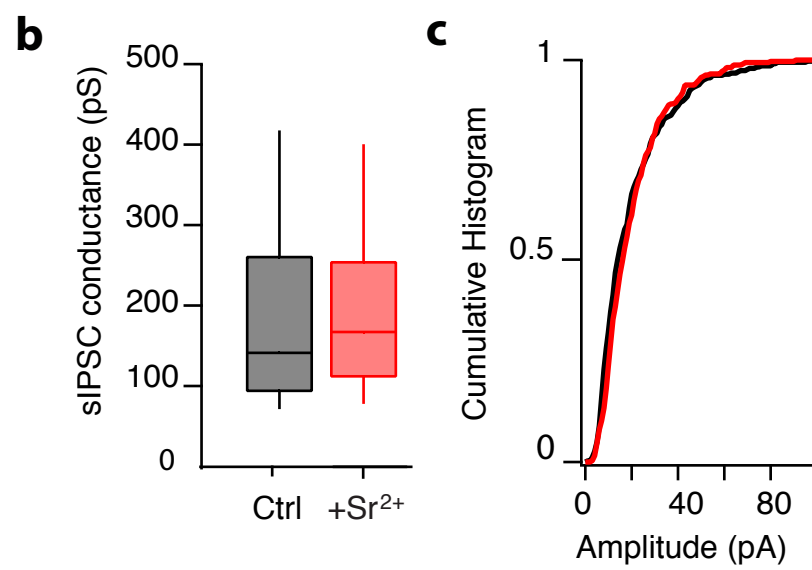

Supplement: supp [file elife-02397-supp-v1.zip]

**Figure 3-figure supplemental 1**

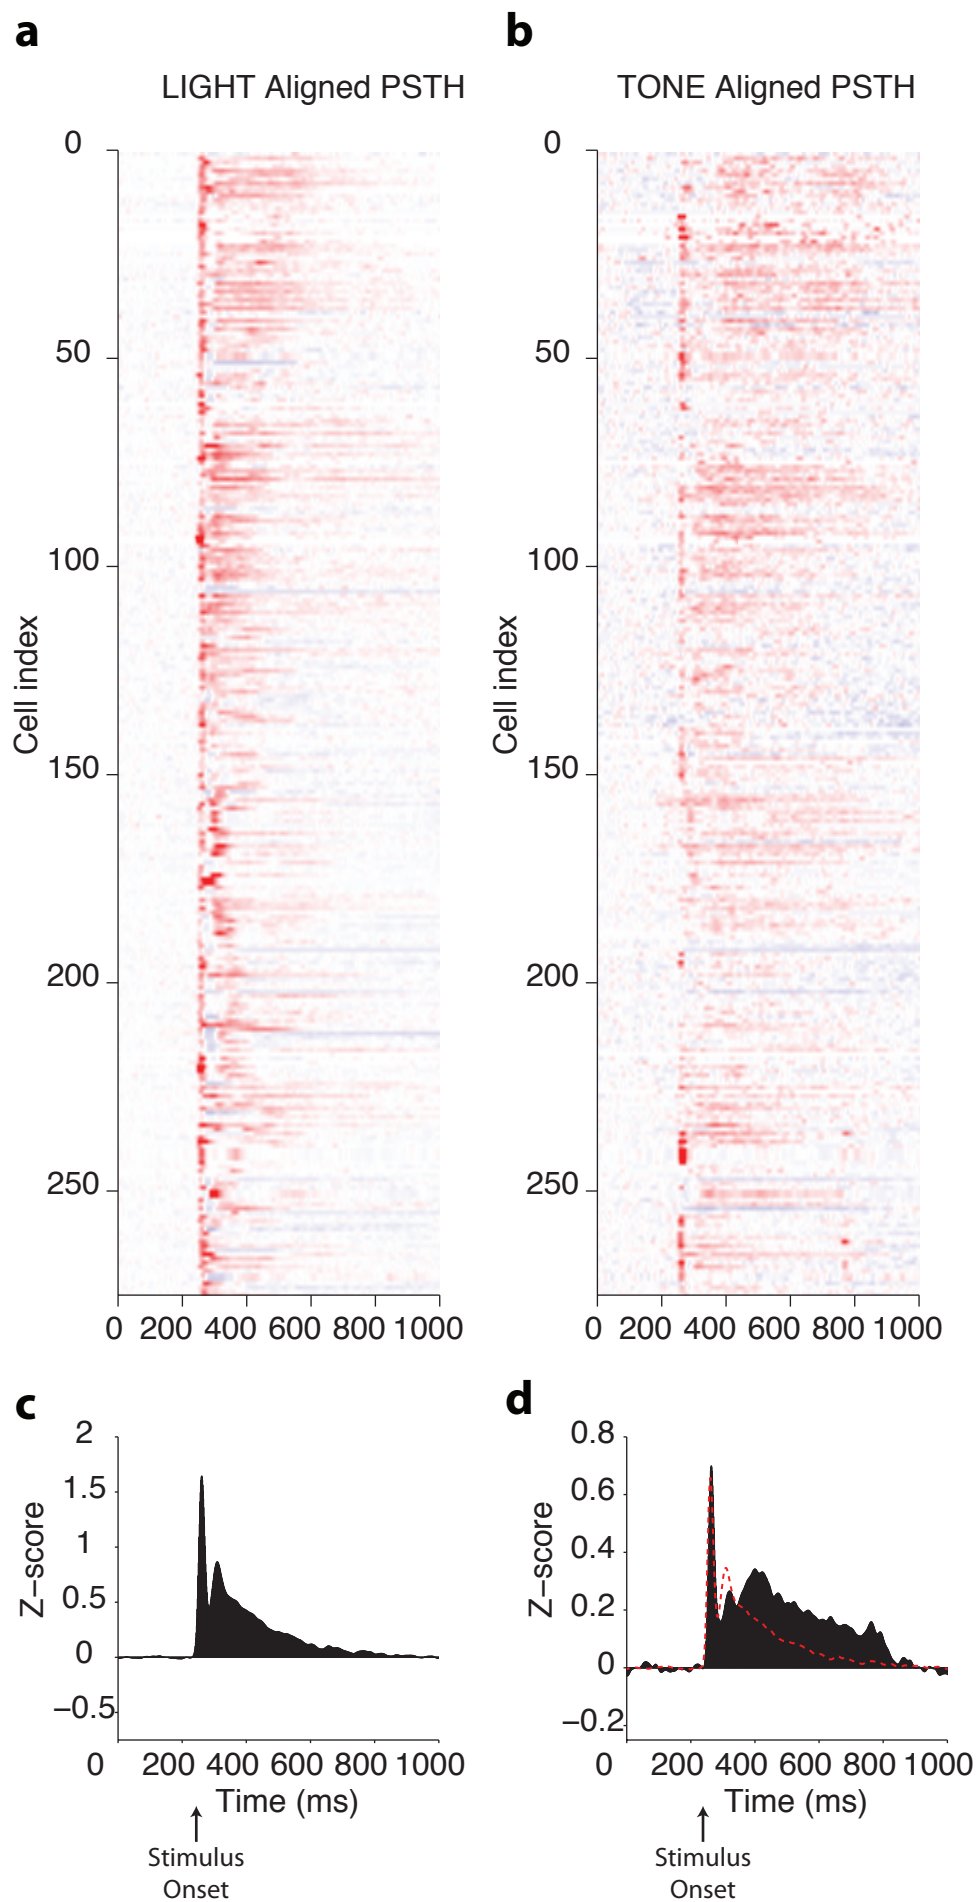

Supplement: supp [file elife-02397-supp-v1.zip]

Figure 7-figure supplemental 2

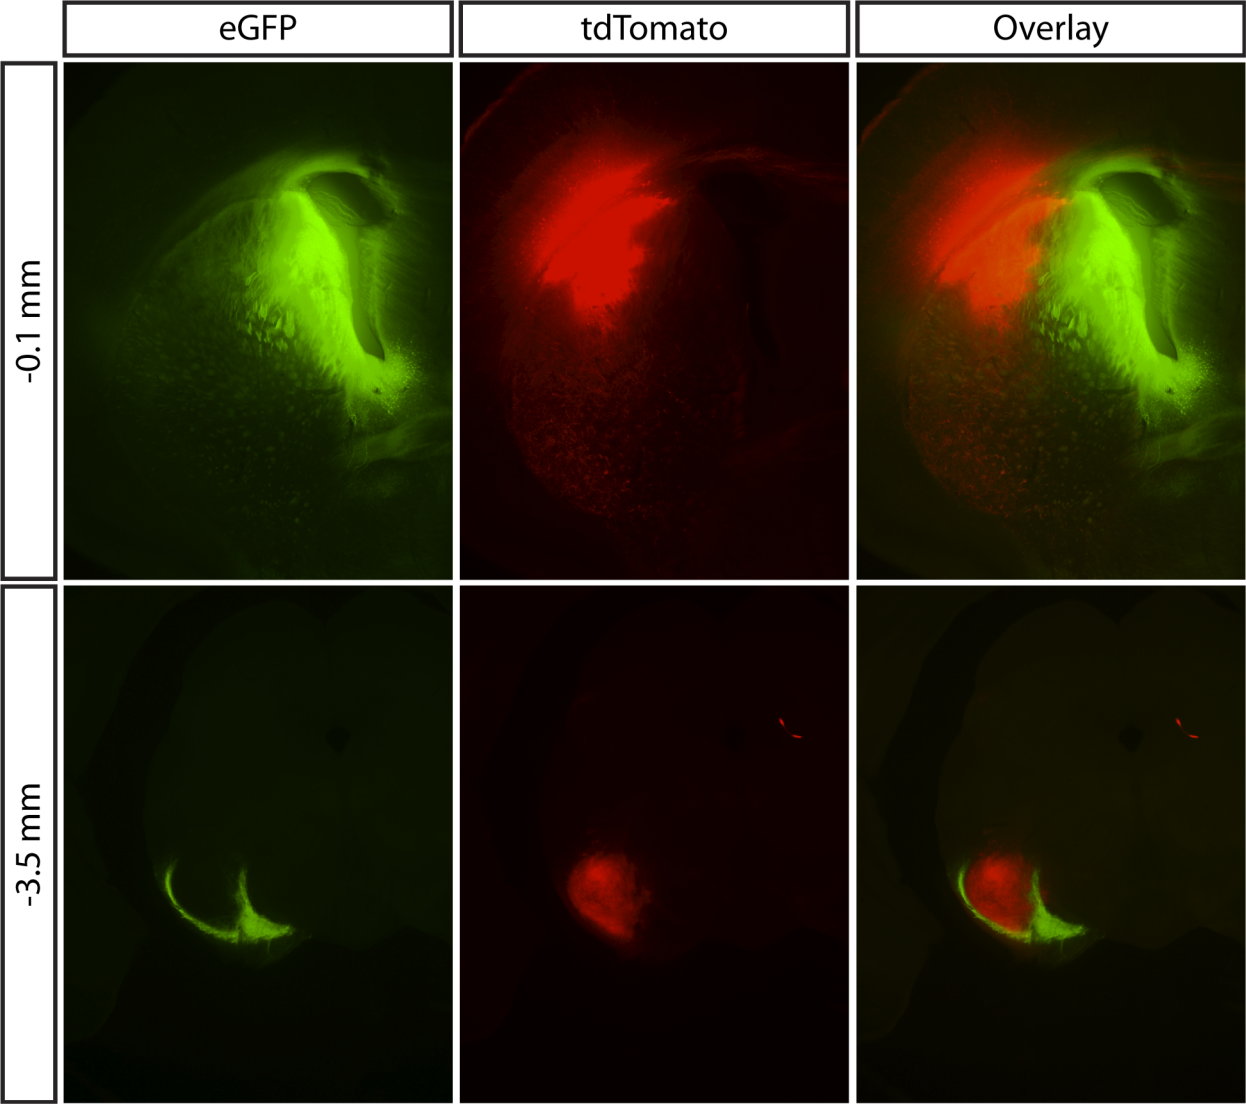

Supplement: supp [file elife-02397-supp-v1.zip]

Figure 8-figure supplemental 1

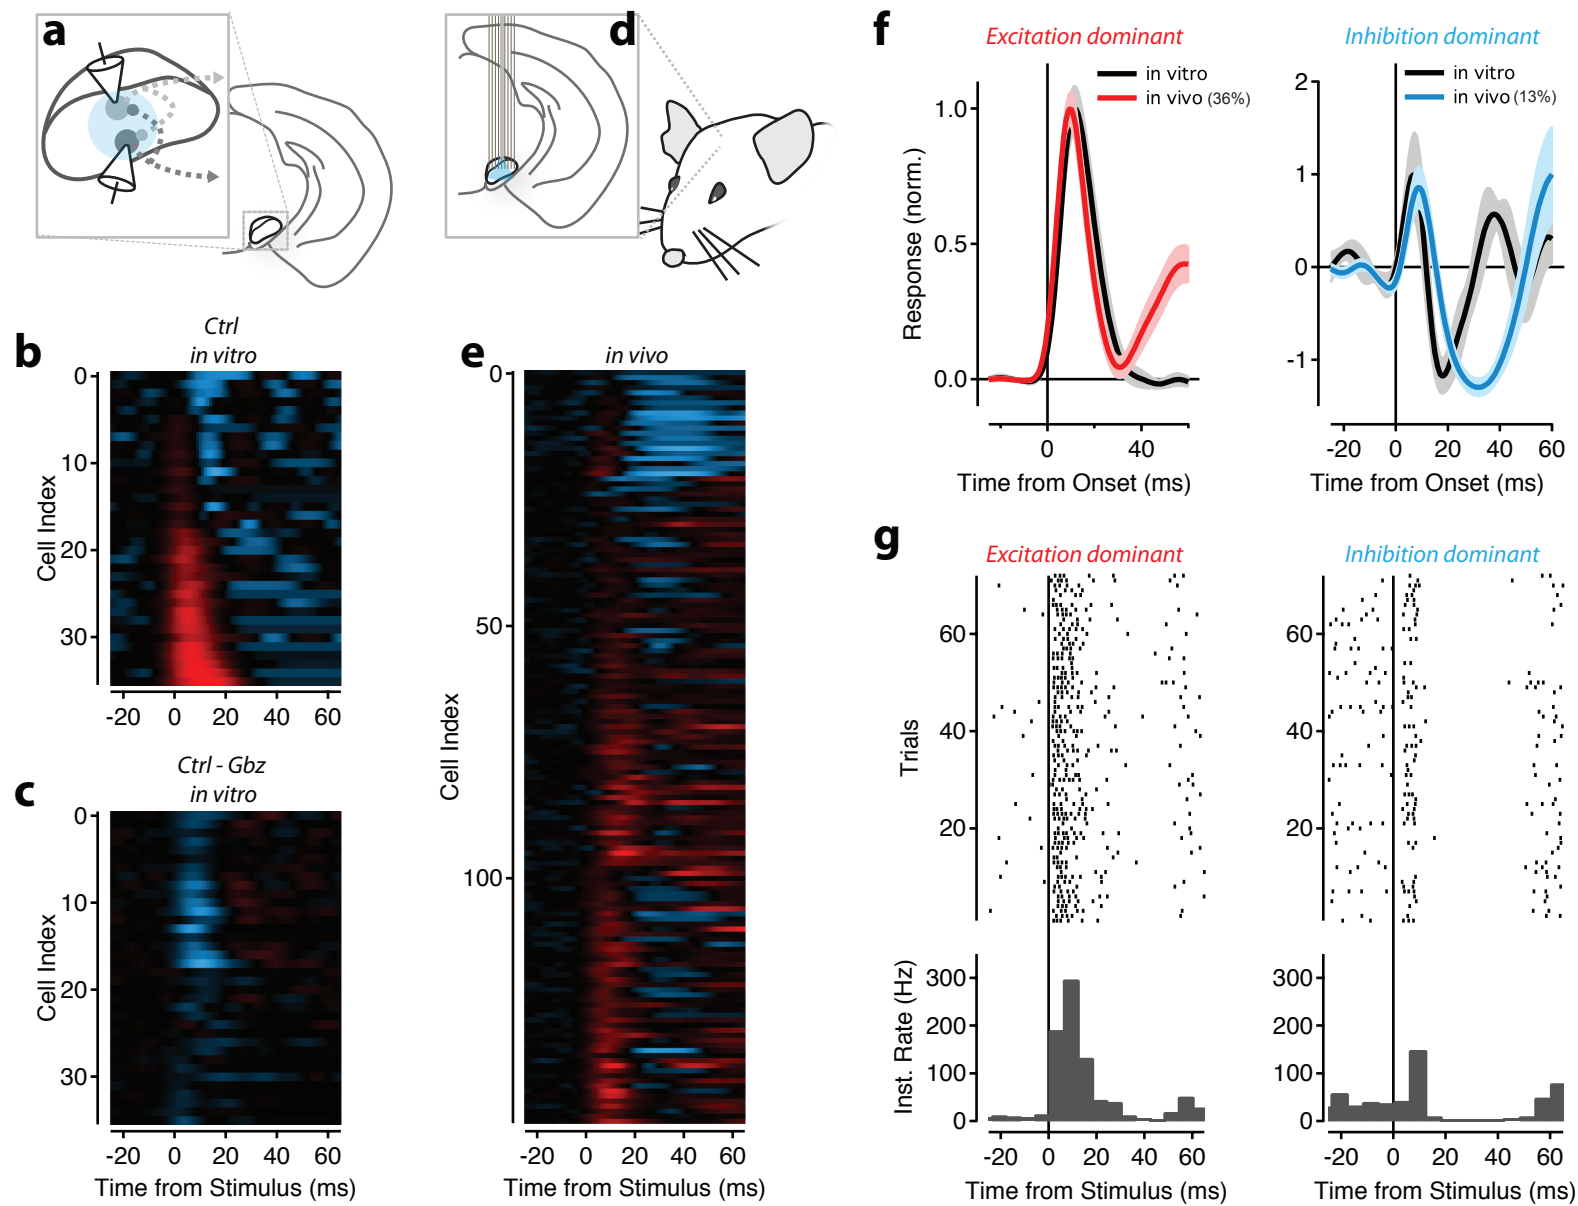

Supplement: supp [file elife-02397-supp-v1.zip]

**Figure 4-figure supplemental 2**

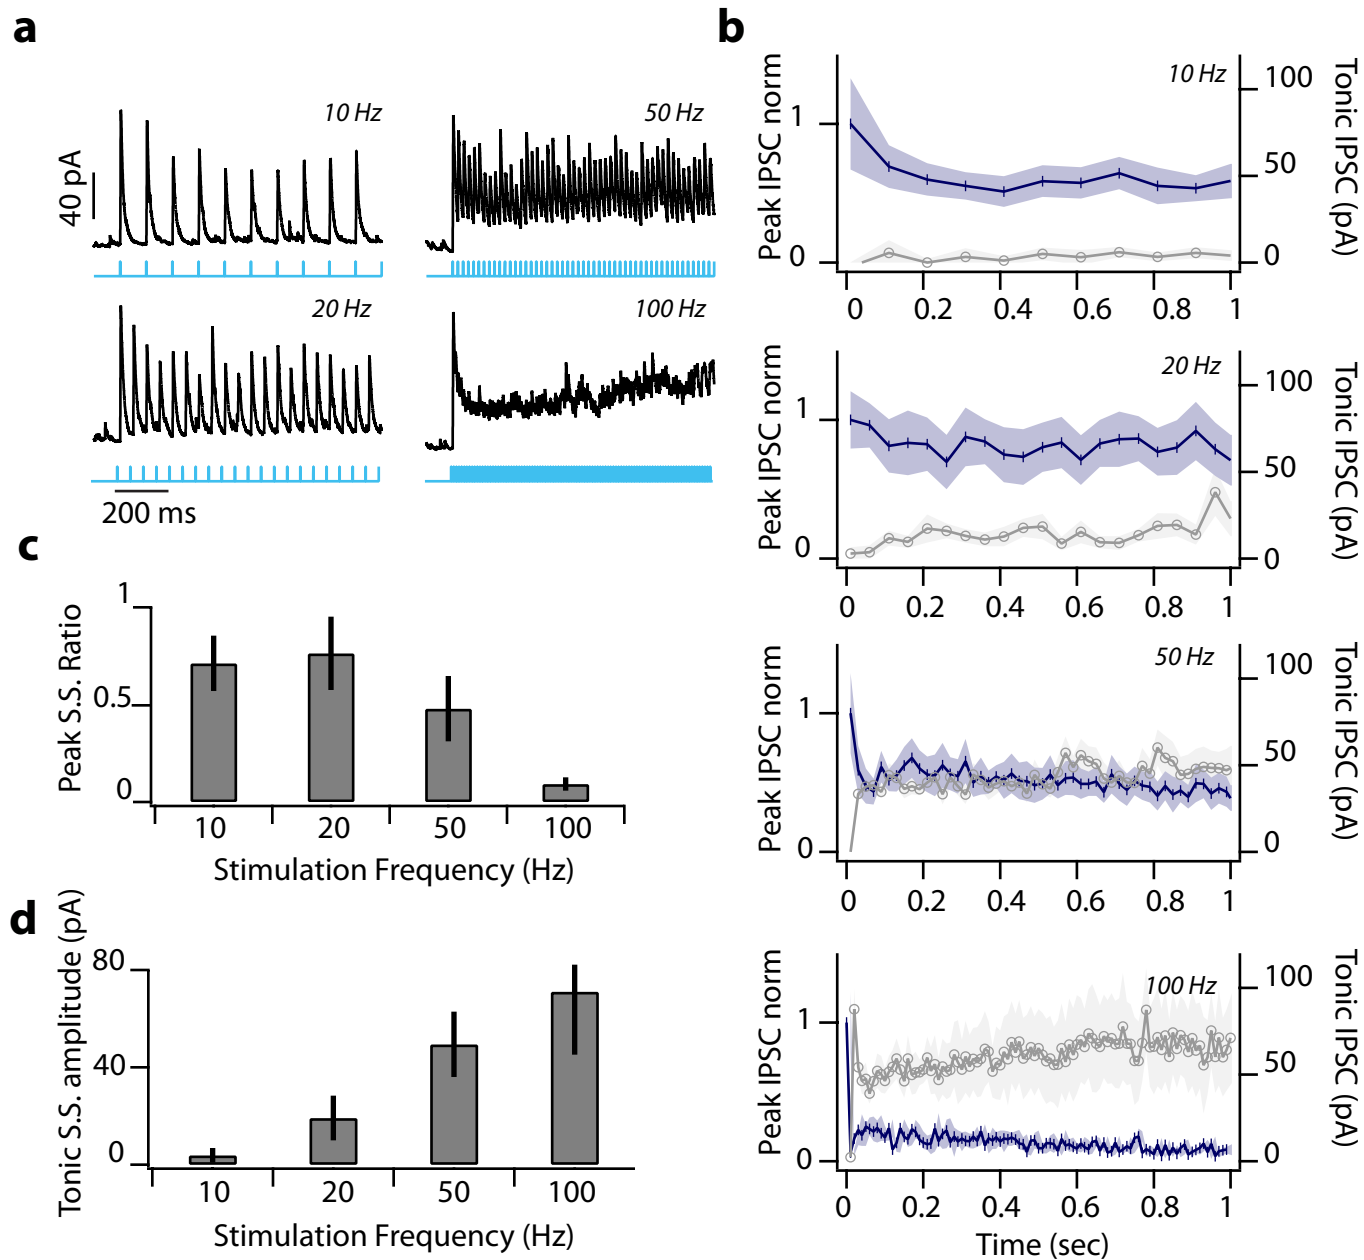

Supplement: supp [file elife-02397-supp-v1.zip]

**Figure 4-figure supplemental 1**

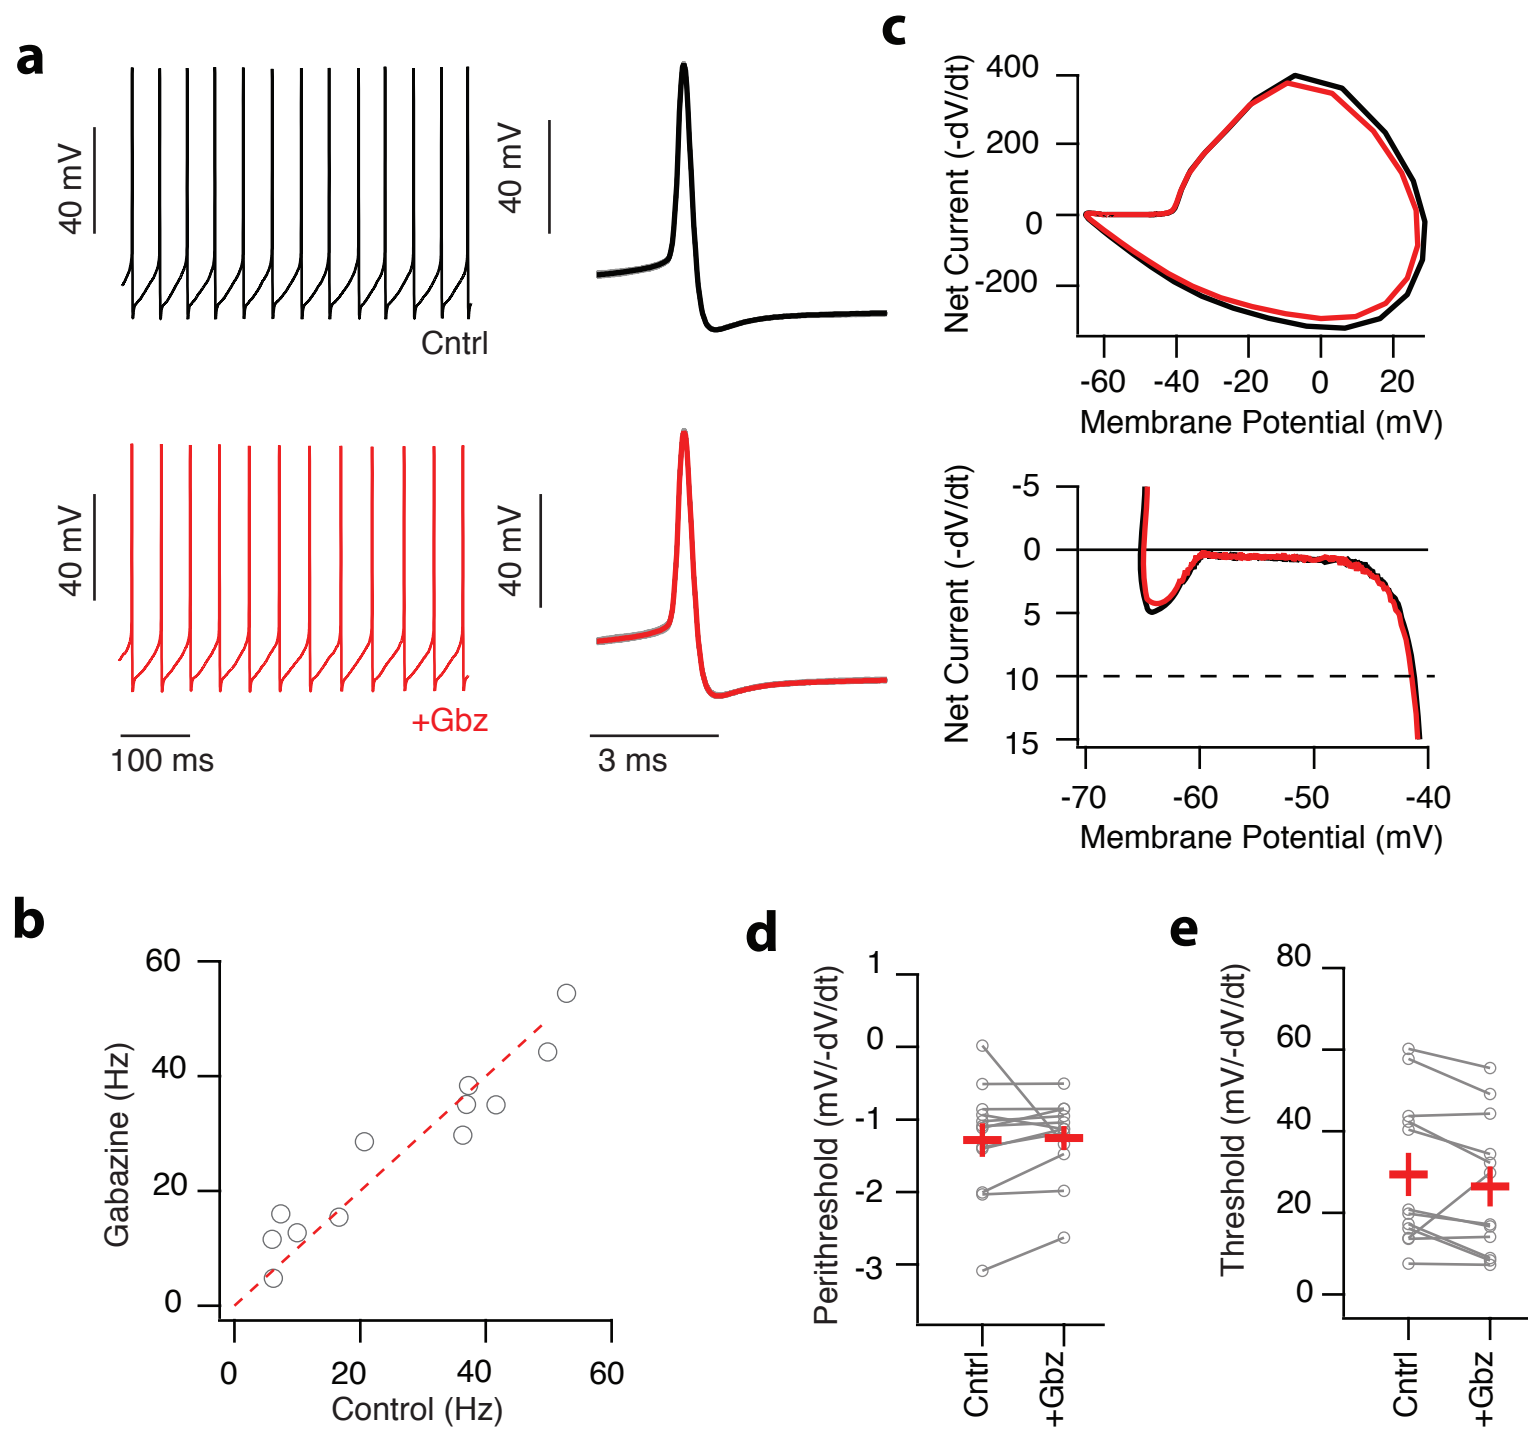

Supplement: supp [file elife-02397-supp-v1.zip]

**Figure 6-figure supplemental 1**

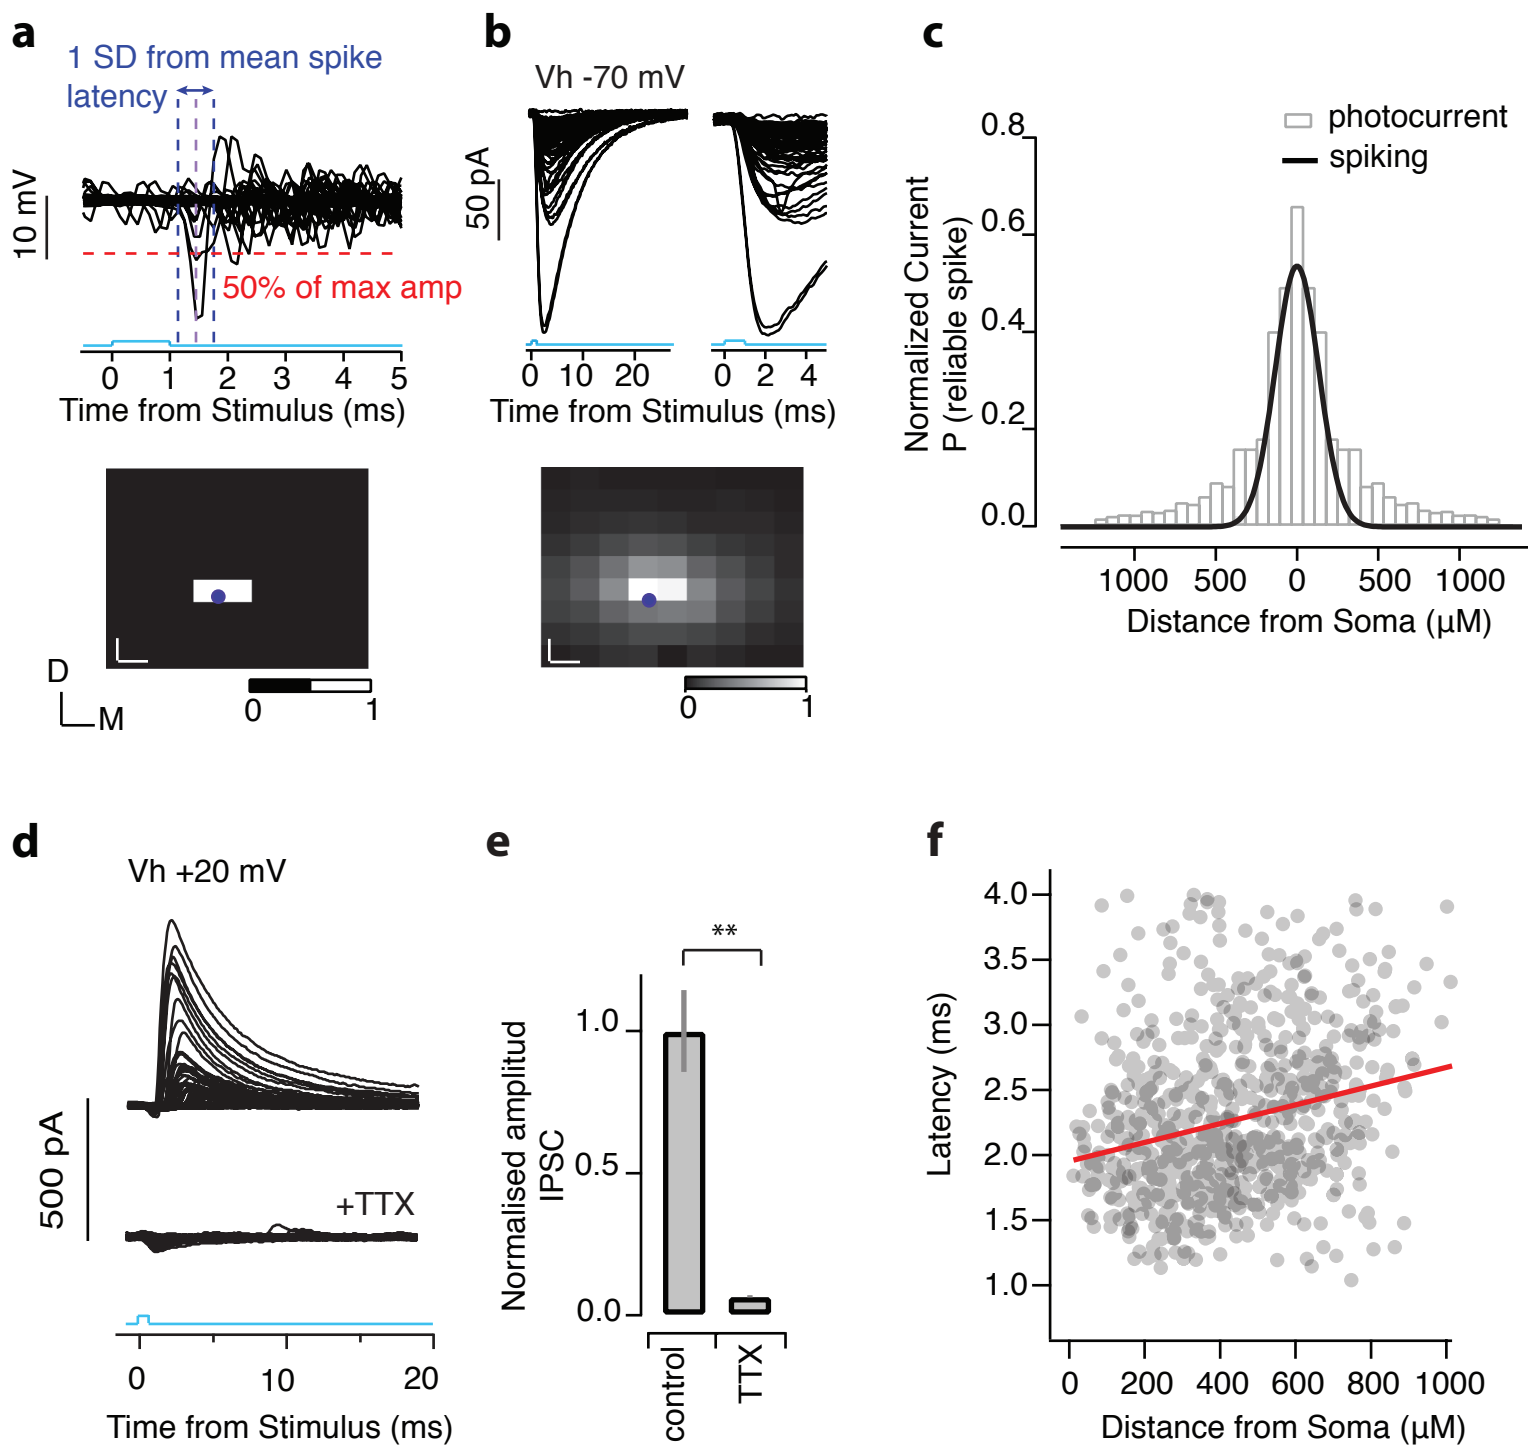

Supplement: supp [file elife-02397-supp-v1.zip]

Figure 7-figure supplemental 1

**a**

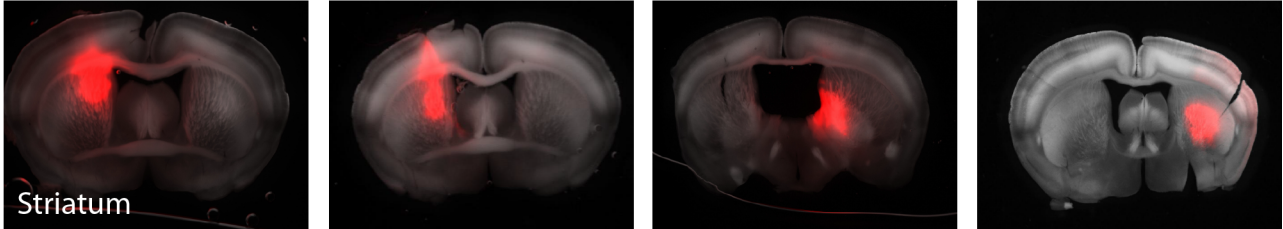

**b**

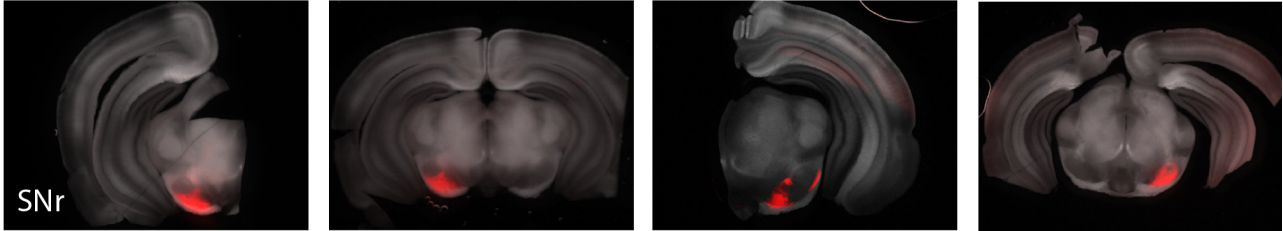

Supplement: supp [file elife-02397-supp-v1.zip]

**Figure 5-figure supplemental 1**

**a** *Gad2-ChR2*

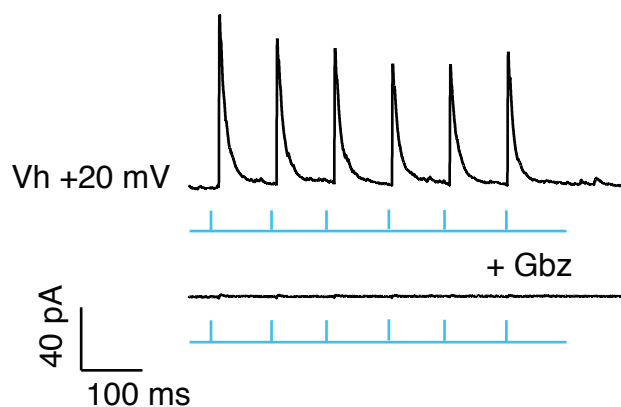

**b** *Thy1-ChR2*

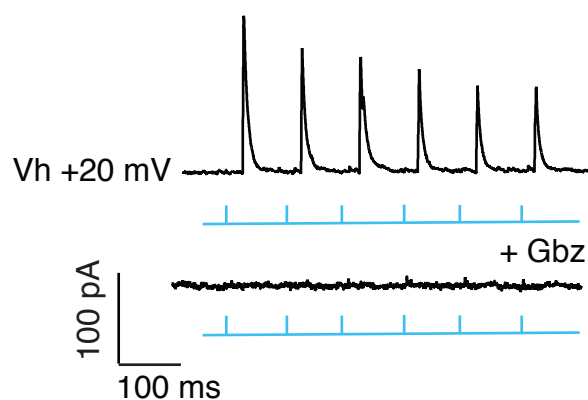

**c** *Thy1-ChR2*  
*Gad2-ChR2*

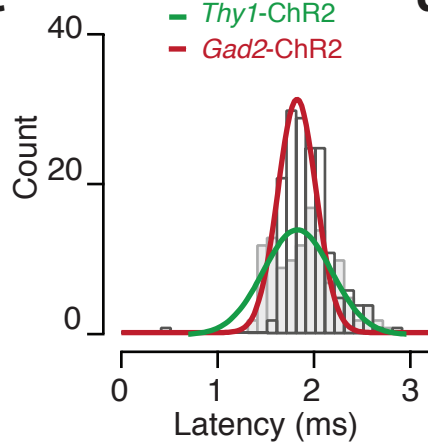

**d**

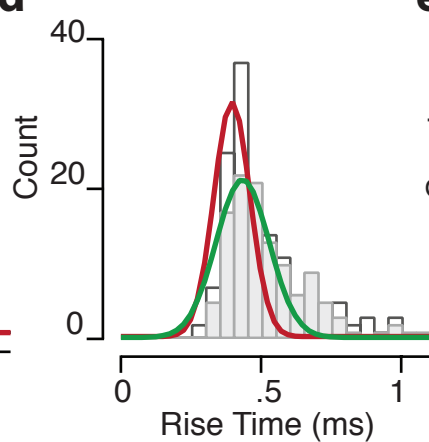

**e**

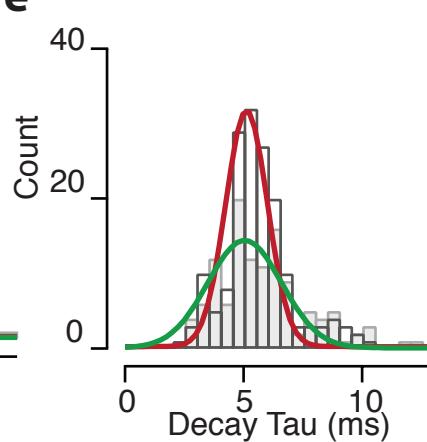

**f**

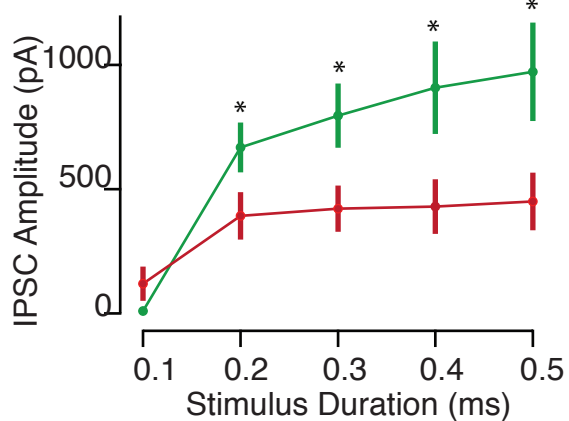

**g**

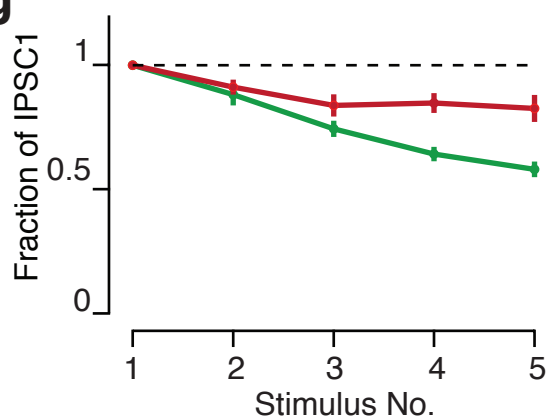

Supplement: supp [file elife-02397-supp-v1.zip]
